# Supplementary material for: Microtubule Associated Protein 1b (MAP1B) Is a Marker of the Microtubular Cytoskeleton in Podocytes but Is Not Essential for the Function of the Kidney Filtration Barrier in Mice
Source: PubMed Central journal article supplement (PMC4598083; doi:10.1371/journal.pone.0140116), 2015-10-08

### Supplemental Figure 3

**A**

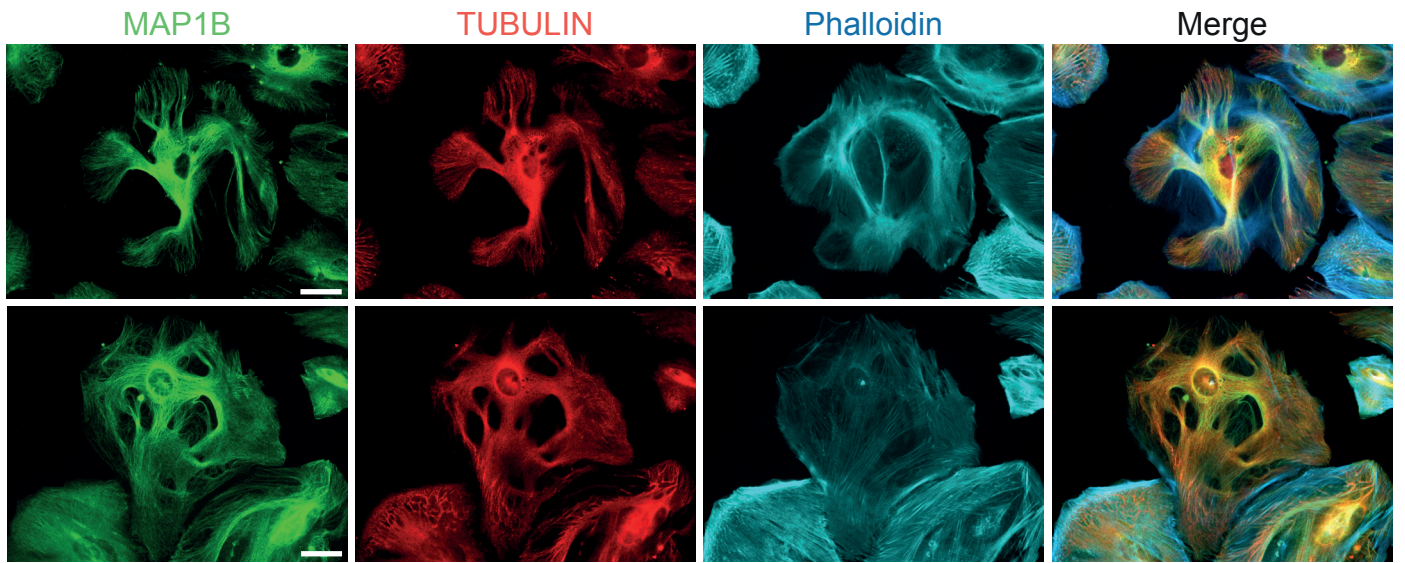

**B**

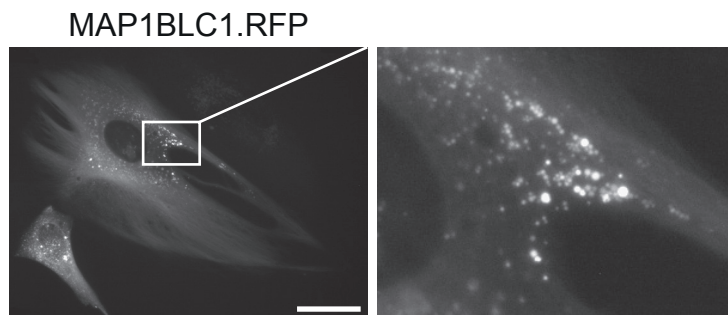

Supplement: pone.0140116.s003.pdf [file pone.0140116.s003.pdf]
